# Supplementary material
Source: publisher figshare collection journal article supplement (https://sage.figshare.com/ndownloader/files/17985836)
Supplement: Supplementary file 1 [file 17985836]

Appendix Table A1: For all outcome measures the results of Little's MCAR test

| Outcome measure                | Chi-Square test       | p-value |
|--------------------------------|-----------------------|---------|
| FFI Pain                       | $\chi^2(30) = 16.330$ | 0.980   |
| FFI Disability                 | $\chi^2(27) = 21.993$ | 0.738   |
| FFI Activity                   | $\chi^2(27) = 24.285$ | 0.614   |
| AOFAS                          | $\chi^2(28) = 17.190$ | 0.945   |
| WHOQOL                         |                       |         |
| Overall QoL and General Health | $\chi^2(24) = 19.058$ | 0.749   |
| WHOQOL Physical Health         | $\chi^2(27) = 25.478$ | 0.548   |
| WHOQOL Psychological Health    | $\chi^2(27) = 32.715$ | 0.207   |
| WHOQOL Social Relationships    | $\chi^2(42) = 47.296$ | 0.265   |
| WHOQOL Environment             | $\chi^2(27) = 27.631$ | 0.430   |

Abbreviations: QoL =y of Life, FFI = Foot Function Index, AOFAS = American Orthopedic Function and Activity Score; WHOQOL = World Health Organization Quality of Life instrument

*Appendix Table A2: For all outcome measures the results of the F-test on the three-way interaction between treatment, dosage and time, both for models with- and without adjustment for quadratic and cubic time effects.*

| Outcome measure                | Time modeled linearly |                | Time modeled linearly, quadratically and cubically |                |
|--------------------------------|-----------------------|----------------|----------------------------------------------------|----------------|
|                                | <i>F-test</i>         | <i>p-value</i> | <i>F-test</i>                                      | <i>p-value</i> |
| FFI Pain†∇                     | F(1,96.636) = 3.157   | 0.079          | F(1,178.136) = 0.237                               | 0.627          |
| FFI Disability†                | F(1,117.726) = 0.434  | 0.511          | F(1,210.527) = 0.602                               | 0.439          |
| FFI Activity†                  | F(1,122.073) = 0.001  | 0.977          | F(1,203.000) = 0.235                               | 0.628          |
| AOFAS†                         | F(1,126.834) = 1.919  | 0.168          | F(1,212.003) = 1.249                               | 0.265          |
| <i>WHOQOL</i>                  |                       |                |                                                    |                |
| Overall QOL and General Health | F(1,116.196) = 2.687  | 0.104          | F(1,213.489) = 0.475                               | 0.491          |
| Physical Health†               | F(1,122.828) = 3.645  | 0.059          | F(1,175.282) = 1.549                               | 0.215          |
| Psychological Health           | F(1,113.226) = 0.747  | 0.389          | F(1,167.989) = 1.320                               | 0.252          |
| Social Relationships           | F(1,104.084) = 3.447  | 0.066          | F(1,187.336) = 0.085                               | 0.771          |
| Environment                    | F(1,126.952) = 0.631  | 0.429          | F(1,192.948) = 2.174                               | 0.142          |

\* Statistically significant based on the criteria reported in our statistical analysis paragraph

† These models showed significant quadratic- and cubic time effects

∇ Primary outcome measure
